# Supplementary material
Source: publisher figshare collection journal article supplement (https://gsapubs.figshare.com/ndownloader/files/22758455)
Supplement: Supplementary file 1 [file 22758455]

**Data Repository Item**  
**Methodological Details and Supplementary Data**

**Soreghan, Soreghan, Poulsen, Young, Eble, Sweet, & Davogustto**  
**“Anomalous Cold in the Pangaeen Tropics”**

**GPS Locations**

For outcrop (1) and borehole (2) locations cited in the manuscript (Figure 1):

(1) 38°46.354 N, 108°53.024 W and 38°36.291 N, 108°53.061 W

(2) 38°46.052 N, 108°48.861 W

**Gravity Analyses**

The gravity survey used a LaCoste-Romberg Type D gravimeter. The station interval was 32 m (Figure DR1), and the station locations were determined by differential GPS measurements. Three gravity observations were averaged at each station, and a linear-drift correction applied. The reduced free-air gravity anomaly included a free-air correction, a latitude correction and a tidal correction as detailed below. The program GM-SYS was used in 2 ½ D gravity modeling mode and accounted for canyon topography over a 3 km cross-section centered on the Massey #1 well. The standard value for basement density, 2.67 gm/cc, was chosen, and an optimal density for the fill, 1.93 gm/cc, was determined by modeling. Velocities from a nearby shallow refraction/reflection seismic survey (see Fig. DR1 and Suarez, 2007) were consistent with the densities used in gravity modeling.

Drift Correction—For the linear drift correction, we established a base station, recorded readings here at the beginning and end of the survey and used the difference:

$$dc_s = \frac{g_{obsb2} - g_{obsb1}}{t_{b2} - t_{b1}} (t_s - t_{b1})$$

Where  $dc_s$  is the drift correction for the station,  $t_{b1}$  and  $t_{b2}$  are the times at the start and the end of the survey in the base station,  $g_{obs}$  are the null readings at the base and  $t_s$  is the time at the station.

Latitude Correction--The latitude correction is obtained by differentiating the international gravity formula with respect to latitude:

$$Lc = (1/R_e) \Delta g / \Delta \phi$$

$$Lc = 0.811 \sin(2\phi) \Delta S \text{ mGal/ Km}$$

Where  $\phi$  is the latitude,  $\Delta S$  is the horizontal distance from the base station. The correction is always added to  $g$  as one moves toward the equator.

Free Air Correction—We accounted for elevational changes between stations by reducing all to a common datum. The Free air correction is then obtained by deriving the scalar equation of the gravity acceleration with respect the radial distance:

$$c_{fa} = 2g/R_e$$

$$c_{fa} = 0.3086h \text{ mGal/m}$$

The free air correction is added to or subtracted from the field reading depending on whether the station is above or below the datum, respectively.

Bouguer Correction--The Bouguer correction accounts for the mass between the datum surface and the stations and is given by:

$$c_b = 2\pi G\rho h$$

$$c_b = 0.04192\rho h \text{ mGal/m}$$

Terrain Correction--The terrain correction accounts for topographic undulations in regions surrounding each station. Using a detailed topographic map we divided the nearby region using concentric circles and radial lines to construct sectors whose areas increase with distance from the station; then the gravity effect of each sector is calculated from the formula:

$$T_g = G\rho\theta \left[ (r_0 - r_i) + (r_i^2 + \Delta z^2)^{1/2} - (r_0^2 + \Delta z^2)^{1/2} \right]$$

**Figure DR1:** Location map for gravity profiles in western Unaweep Canyon (see Figure 1 of manuscript for additional location information). Note that two profiles were conducted (A and B). Profile A is highlighted as these link to well results, but results for Profile B match those for Profile A in exhibiting a U-shaped basement as a best fit. Topographic bases are portions of the Fish Creek (Colorado) 7 1/2 -minute quad (U.S. Geological Survey, 1972) and the Two V Basin (Colorado) 7 1/2 -minute quad (U.S. Geological Survey, 1969).

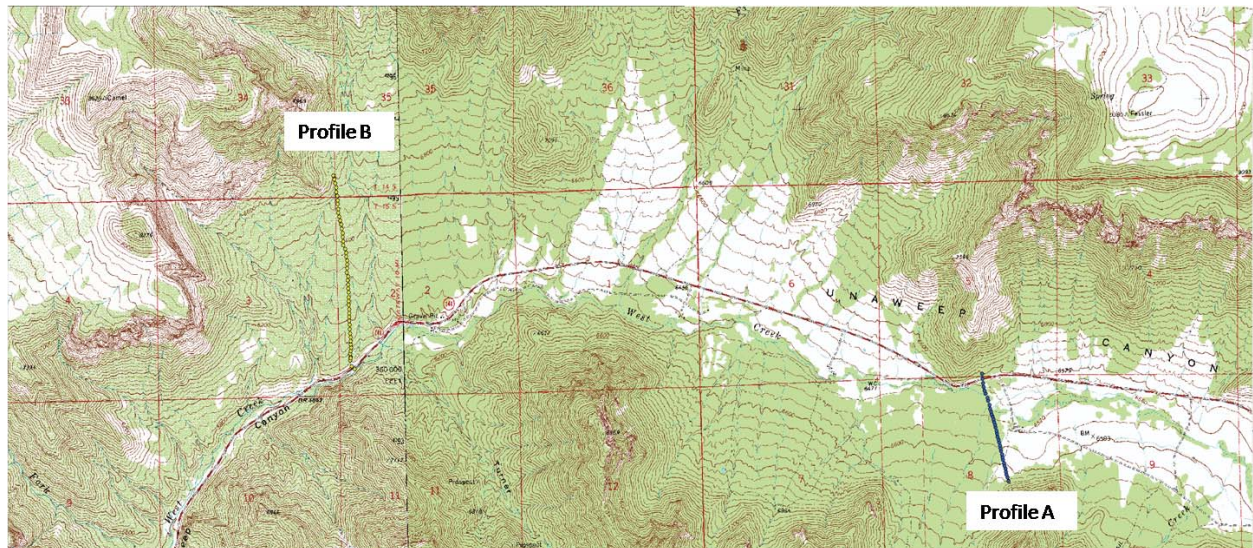

Table DR1: Gravity Data for Profile "A"

| Station         | Easting<br>(m) | Northing<br>(m) | Elevation<br>(m) | Dial<br>Reading | Time  | Time<br>(min) | Time<br>Correction<br>(mGal) | Corrected<br>(mGal) | Dial<br>Converted<br>(mGal) | Latitude<br>Correction<br>(mGal) | Free Air<br>Correction<br>(mGal) |
|-----------------|----------------|-----------------|------------------|-----------------|-------|---------------|------------------------------|---------------------|-----------------------------|----------------------------------|----------------------------------|
| G-1             | 690061.112     | 4292614.622     | 2030.918         | 3041.810        | 10:32 | 19            | -0.130                       | 3192.402            | 3192.532                    | 0.351856137                      | 11.941776                        |
| G-2             | 690053.028     | 4292643.523     | 2019.809         | 3043.760        | 10:48 | 35            | -0.239                       | 3194.339            | 3194.578                    | 0.328901348                      | 8.520204                         |
| G-3             | 690047.101     | 4292667.731     | 2018.602         | 3044.095        | 10:53 | 40            | -0.274                       | 3194.656            | 3194.930                    | 0.309674003                      | 8.148448                         |
| G-4             | 690040.630     | 4292691.723     | 2016.958         | 3044.230        | 11:02 | 49            | -0.335                       | 3194.736            | 3195.072                    | 0.290618216                      | 7.642096                         |
| G-5             | 690034.056     | 4292715.562     | 2015.156         | 3044.225        | 11:11 | 58            | -0.397                       | 3194.670            | 3195.066                    | 0.271683951                      | 7.08708                          |
| G-6             | 690027.438     | 4292739.362     | 2013.360         | 3044.495        | 11:21 | 68            | -0.465                       | 3194.885            | 3195.350                    | 0.252780662                      | 6.533912                         |
| G-7             | 690021.413     | 4292763.248     | 2011.265         | 3045.000        | 11:32 | 79            | -0.540                       | 3195.339            | 3195.880                    | 0.233809066                      | 5.888652                         |
| G-8             | 690015.156     | 4292787.518     | 2009.622         | 3045.105        | 11:51 | 98            | -0.670                       | 3195.320            | 3195.990                    | 0.214532477                      | 5.382608                         |
| G-9             | 690008.681     | 4292811.416     | 2006.980         | 3045.615        | 11:58 | 105           | -0.718                       | 3195.807            | 3196.525                    | 0.195551351                      | 4.568872                         |
| G-10            | 690002.712     | 4292835.727     | 2005.172         | 3045.635        | 12:08 | 115           | -0.787                       | 3195.759            | 3196.546                    | 0.176242196                      | 4.012008                         |
| G-11            | 689996.286     | 4292859.870     | 2003.249         | 3046.250        | 12:41 | 148           | -1.013                       | 3196.179            | 3197.192                    | 0.157066477                      | 3.419724                         |
| G-12            | 689990.198     | 4292883.978     | 2001.301         | 3046.600        | 12:49 | 156           | -1.067                       | 3196.492            | 3197.559                    | 0.137918557                      | 2.81974                          |
| G-13            | 689984.158     | 4292908.115     | 2000.329         | 3046.895        | 12:53 | 160           | -1.095                       | 3196.774            | 3197.869                    | 0.118747604                      | 2.520364                         |
| G-14            | 689977.999     | 4292932.276     | 1998.783         | 3046.970        | 13:00 | 167           | -1.142                       | 3196.805            | 3197.947                    | 0.099557588                      | 2.044196                         |
| G-15            | 689971.562     | 4292956.492     | 1996.353         | 3047.400        | 13:13 | 180           | -1.231                       | 3197.167            | 3198.399                    | 0.080323889                      | 1.295756                         |
| G-16            | 689965.069     | 4292980.575     | 1996.185         | 3047.545        | 13:34 | 10            | -0.061                       | 3197.183            | 3198.551                    | 0.061195825                      | 1.244012                         |
| G-17            | 689958.779     | 4293004.385     | 1994.957         | 3047.825        | 13:42 | 18            | -0.111                       | 3197.427            | 3198.845                    | 0.042284593                      | 0.865788                         |
| G-18            | 689952.724     | 4293028.730     | 1993.617         | 3048.185        | 13:53 | 29            | -0.178                       | 3197.738            | 3199.223                    | 0.022948434                      | 0.453068                         |
| G-19<br>(Datum) | 689945.288     | 4293057.623     | 1992.146         | 3048.550        | 13:59 | 35            | -0.215                       | 3198.084            | 3199.606                    | 0                                | 0                                |
| G-20            | 689940.432     | 4293076.980     | 1990.712         | 3048.800        | 14:09 | 45            | -0.276                       | 3198.285            | 3199.868                    | -0.015374411                     | -0.441672                        |
| G-21            | 689933.783     | 4293100.965     | 1989.632         | 3049.100        | 14:18 | 54            | -0.332                       | 3198.545            | 3200.183                    | -0.034424637                     | -0.774312                        |
| G-22            | 689927.121     | 4293124.627     | 1987.781         | 3049.550        | 14:28 | 64            | -0.393                       | 3198.955            | 3200.655                    | -0.053218319                     | -1.34442                         |
| G-23            | 689920.147     | 4293145.727     | 1987.147         | 3049.930        | 14:42 | 78            | -0.479                       | 3199.268            | 3201.054                    | -0.069977118                     | -1.539692                        |
| G-24            | 689910.033     | 4293165.737     | 1984.628         | 3050.660        | 14:49 | 85            | -0.522                       | 3199.991            | 3201.820                    | -0.085870177                     | -2.315544                        |
| G-25            | 689903.628     | 4293187.335     | 1983.640         | 3050.790        | 15:06 | 102           | -0.627                       | 3200.023            | 3201.957                    | -0.103024515                     | -2.619848                        |
| G-26            | 689897.469     | 4293209.921     | 1981.268         | 3051.455        | 15:18 | 114           | -0.700                       | 3200.648            | 3202.655                    | -0.120963578                     | -3.350424                        |
| G-27            | 689890.673     | 4293240.493     | 1979.285         | 3052.280        | 15:38 | 134           | -0.823                       | 3201.391            | 3203.520                    | -0.145245568                     | -3.961188                        |
| G-28            | 689880.096     | 4293277.366     | 1978.738         | 3052.525        | 15:48 | 144           | -0.884                       | 3201.586            | 3203.778                    | -0.174532164                     | -4.129664                        |
| G-29            | 689871.683     | 4293301.226     | 1978.188         | 3053.100        | 15:56 | 152           | -0.934                       | 3202.141            | 3204.381                    | -0.193483108                     | -4.299064                        |
| G-30            | 689857.189     | 4293333.885     | 1977.183         | 3053.360        | 16:06 | 162           | -0.995                       | 3202.352            | 3204.654                    | -0.21942271                      | -4.608604                        |

Soreghan, p. 6

| Station | Easting<br>(m) | Northing<br>(m) | Elevation<br>(m) | Dial<br>Reading | Time  | Time<br>(min) | Correction<br>(mGal) | Corrected<br>(mGal) | Dial<br>Converted<br>(mGal) | Latitude<br>Correction<br>(mGal) | Free Air<br>Correction<br>(mGal) |
|---------|----------------|-----------------|------------------|-----------------|-------|---------------|----------------------|---------------------|-----------------------------|----------------------------------|----------------------------------|
| G-31    | 689844.456     | 4293359.644     | 1978.640         | 3053.540        | 10:11 | 17            | 0.019                | 3203.555            | 3204.843                    | -0.239881947                     | -4.159848                        |
| G-32    | 689837.539     | 4293390.637     | 1981.016         | 3053.260        | 10:29 | 35            | 0.039                | 3203.281            | 3204.549                    | -0.264498318                     | -3.42804                         |
| G-33    | 689832.970     | 4293421.808     | 1987.364         | 3052.120        | 10:42 | 48            | 0.054                | 3202.099            | 3203.353                    | -0.289256067                     | -1.472856                        |
| G-34    | 689826.886     | 4293455.205     | 1996.005         | 3051.250        | 10:54 | 60            | 0.067                | 3201.200            | 3202.439                    | -0.31578183                      | 1.188572                         |
| G-35    | 689823.110     | 4293495.814     | 2006.005         | 3049.745        | 11:06 | 72            | 0.080                | 3199.634            | 3200.860                    | -0.348035766                     | 4.268572                         |
| Base    | 689932.727     | 4293104.603     | 1989.525         | 3050.255        | 10:13 | 0             | 0.000                | 3201.395            | 3201.395                    | -0.03731414                      | -0.807268                        |
| Base    | 689932.727     | 4293104.603     | 1989.525         | 3049.010        | 13:24 | 191           | -1.307               | 3198.782            | 3200.088                    | -0.03731414                      | -0.807268                        |
| Base    | 689932.727     | 4293104.603     | 1989.525         | 3049.225        | 16:20 | 176           | -1.081               | 3199.233            | 3200.314                    | -0.03731414                      | -0.807268                        |
| Base    | 689932.727     | 4293104.603     | 1989.525         | 3049.305        | 9:54  | 0             | 0.000                | 3200.398            | 3200.398                    | -0.03731414                      | -0.807268                        |
| Base    | 689932.727     | 4293104.603     | 1989.525         | 3049.405        | 11:28 | 94            | 0.105                | 3200.608            | 3200.503                    | -0.03731414                      | -0.807268                        |

## Palynology

Palynological results from outcrop and core samples are also reported in Soreghan et al. (2007). Figure DR2 illustrates representative Paleozoic palynomorphs recovered from the basal diamictite encountered in core from the Massey well (point 2 on Fig. 1). All samples were processed and analyzed by C.F. Eble at the Kentucky Geological Survey. Multiple sample splits were processed, each time using virgin sample containers, to exclude the possibility of contamination. The recovered palynomorph assemblage is indicative of Late Pennsylvanian-Early Permian age, and most probably Early Permian.

**Figure DR2:** Photomicrographs of palynomorphs: (A) *Vesicaspora wilsonii* (long axis 67  $\mu\text{m}$ ); (B) *Florinites* (long axis 45  $\mu\text{m}$ ); (C) *Endosporites globiformis* (long axis 90  $\mu\text{m}$ ); (D) *Thymospora thiennesii* (long axis 23  $\mu\text{m}$ ); (E) *Laevigatosporites minor* (long axis 43  $\mu\text{m}$ ); (F) *Lycospora granulata* (long axis 39  $\mu\text{m}$ ).

*Vesicaspora wilsonii*

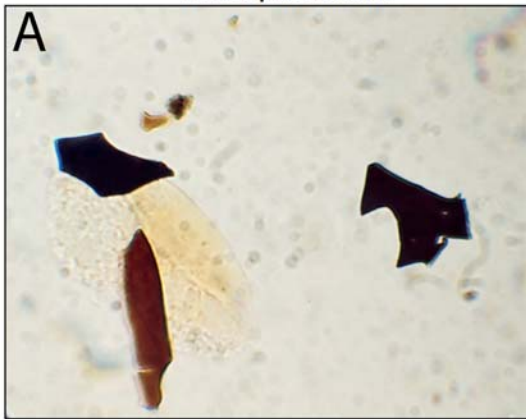

*Florinites* (degraded)

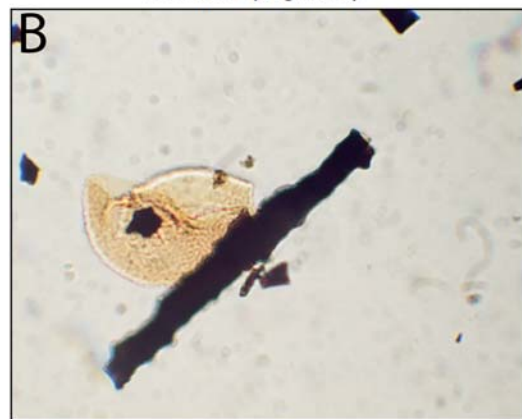

*Endosporites globiformis*

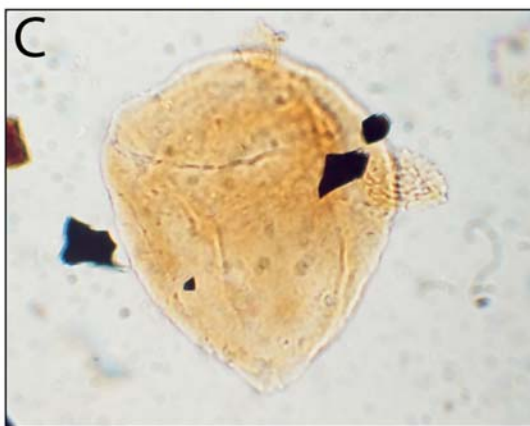

*Thymospora thienssenii*

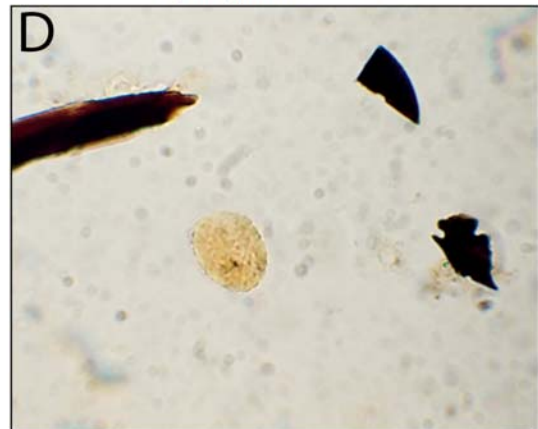

*Laevigatosporites minor* (degraded condition)

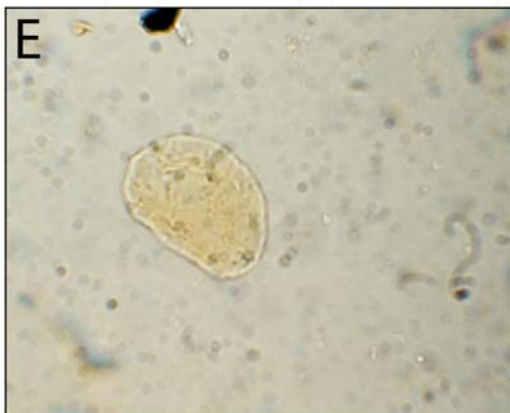

*Lycospora granulata*

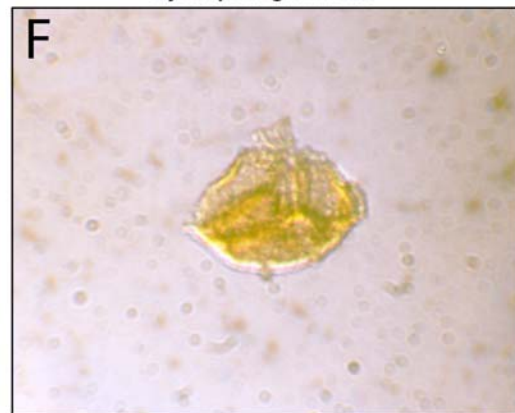



### **Scanning Electron Microscopy (SEM)**

Four samples of poorly consolidated upper Paleozoic diamictite were processed to clean and isolate quartz for SEM analysis of surface textures. Two of the samples are from the diamictite exposed in western Unaweep Canyon (point 1 on Fig. 1), and two are from the diamictite recovered in the core (315.3 and 318.2 m depths) from the Massey well (point 2 on Fig. 1). Samples were disaggregated by immersion in a dilute dispersant of sodium carbonate and subsequently treated with the citrate-bicarbonate-dithionite (CBD) method to remove iron oxides (Mehra and Jackson, 1960; Janitzky, 1986). After sieving to isolate the coarse-grained (500-2000  $\mu\text{m}$ ) sand fraction, 16-22 quartz grains per sample were randomly selected and mounted for detailed examination on a scanning electron microscope (SEM, Zeiss DSM-960A). Microtextures were identified and logged following established standards and techniques (Mahaney, 2002). All features logged exhibit slight to moderate precipitation coatings, indicating their antiquity (Fig. 2F). Occurrence frequency of features is tabulated in Table DR2 (categories from Mahaney, 2002) where data from Mahaney and Kalm (2000) are also tabulated for comparison. Several authors have established that some microtextures uniquely identify specific transport processes (references below). For example, gouges, grooves and troughs reflect grain-to-grain contact under high-stress conditions, most characteristic of glacial till of varying geologic age (Mahaney et al., 1996; Mahaney and Kalm, 2000; Mahaney, 2002; Van Hoesen et al., 2004). In contrast, v-shaped cracks, edge rounding and breakage blocks reflect fracturing formed by percussion (i.e., saltation) dominant in fluvial systems (Mahaney and Kalm, 2000). Finally, polygenetic textures are those produced under a variety of conditions, such

as conchoidal fractures that could reflect either grain crushing in a glacial environment or grain fracturing in a fluvial environment (Mahaney, 2002). Hence, the textural classification into 'high-stress,' 'percussion,' and 'polygenetic' categories enables a graphical simplification of textures meant to highlight processes most indicative of glacial versus fluvial environments.

**Table DR2: Tabulation of SEM microtextures on sand-sized quartz**

|                                 | Grains examined (N) |    | fracture faces |    |    |    |    |    |    | subparallel linear fractures |    |    |    |    |    |     | conchoidal fractures |    |    |    |    |  |  | sharp angular features |  |  |  |  |  |  | arc shaped steps |  |  |  |  |  |  | linear steps |  |  |  |  |  |  | abrasion features |  |  |  |  |  |  | crescentic gouges |  |  |  |  |  |  | straight grooves |  |  |  |  |  |  | curved grooves |  |  |  |  |  |  | deep troughs |  |  |  |  |  |  | mechanically-upturned plates |  |  |  |  |  |  | v-shaped percussssion scars |  |  |  |  |  |  | edge rounding |  |  |  |  |  |  | breakage blocks |  |  |  |  |  |  | dissolution etching |  |  |  |  |  |  | weathered surfaces |  |  |  |  |  |  | low relief |  |  |  |  |  |  | medium relief |  |  |  |  |  |  | high relief |  |  |  |  |  |  |
|---------------------------------|---------------------|----|----------------|----|----|----|----|----|----|------------------------------|----|----|----|----|----|-----|----------------------|----|----|----|----|--|--|------------------------|--|--|--|--|--|--|------------------|--|--|--|--|--|--|--------------|--|--|--|--|--|--|-------------------|--|--|--|--|--|--|-------------------|--|--|--|--|--|--|------------------|--|--|--|--|--|--|----------------|--|--|--|--|--|--|--------------|--|--|--|--|--|--|------------------------------|--|--|--|--|--|--|-----------------------------|--|--|--|--|--|--|---------------|--|--|--|--|--|--|-----------------|--|--|--|--|--|--|---------------------|--|--|--|--|--|--|--------------------|--|--|--|--|--|--|------------|--|--|--|--|--|--|---------------|--|--|--|--|--|--|-------------|--|--|--|--|--|--|
| Unaweept diamictite             |                     |    |                |    |    |    |    |    |    |                              |    |    |    |    |    |     |                      |    |    |    |    |  |  |                        |  |  |  |  |  |  |                  |  |  |  |  |  |  |              |  |  |  |  |  |  |                   |  |  |  |  |  |  |                   |  |  |  |  |  |  |                  |  |  |  |  |  |  |                |  |  |  |  |  |  |              |  |  |  |  |  |  |                              |  |  |  |  |  |  |                             |  |  |  |  |  |  |               |  |  |  |  |  |  |                 |  |  |  |  |  |  |                     |  |  |  |  |  |  |                    |  |  |  |  |  |  |            |  |  |  |  |  |  |               |  |  |  |  |  |  |             |  |  |  |  |  |  |
| CUTS I-8                        | 20                  | 75 | 90             | 95 | 65 | 25 | 25 | 15 | 5  | 30                           | 0  | 15 | 30 | 0  | 0  | 35  | 15                   | 0  | 25 | 65 | 10 |  |  |                        |  |  |  |  |  |  |                  |  |  |  |  |  |  |              |  |  |  |  |  |  |                   |  |  |  |  |  |  |                   |  |  |  |  |  |  |                  |  |  |  |  |  |  |                |  |  |  |  |  |  |              |  |  |  |  |  |  |                              |  |  |  |  |  |  |                             |  |  |  |  |  |  |               |  |  |  |  |  |  |                 |  |  |  |  |  |  |                     |  |  |  |  |  |  |                    |  |  |  |  |  |  |            |  |  |  |  |  |  |               |  |  |  |  |  |  |             |  |  |  |  |  |  |
| CUT B1                          | 16                  | 50 | 63             | 69 | 13 | 56 | 44 | 13 | 6  | 0                            | 6  | 31 | 31 | 0  | 25 | 38  | 31                   | 0  | 38 | 56 | 6  |  |  |                        |  |  |  |  |  |  |                  |  |  |  |  |  |  |              |  |  |  |  |  |  |                   |  |  |  |  |  |  |                   |  |  |  |  |  |  |                  |  |  |  |  |  |  |                |  |  |  |  |  |  |              |  |  |  |  |  |  |                              |  |  |  |  |  |  |                             |  |  |  |  |  |  |               |  |  |  |  |  |  |                 |  |  |  |  |  |  |                     |  |  |  |  |  |  |                    |  |  |  |  |  |  |            |  |  |  |  |  |  |               |  |  |  |  |  |  |             |  |  |  |  |  |  |
| Unaweept 1044                   | 20                  | 45 | 80             | 85 | 45 | 55 | 20 | 55 | 25 | 35                           | 5  | 25 | 50 | 0  | 0  | 25  | 80                   | 0  | 20 | 55 | 25 |  |  |                        |  |  |  |  |  |  |                  |  |  |  |  |  |  |              |  |  |  |  |  |  |                   |  |  |  |  |  |  |                   |  |  |  |  |  |  |                  |  |  |  |  |  |  |                |  |  |  |  |  |  |              |  |  |  |  |  |  |                              |  |  |  |  |  |  |                             |  |  |  |  |  |  |               |  |  |  |  |  |  |                 |  |  |  |  |  |  |                     |  |  |  |  |  |  |                    |  |  |  |  |  |  |            |  |  |  |  |  |  |               |  |  |  |  |  |  |             |  |  |  |  |  |  |
| Unaweept 1034.5                 | 22                  | 32 | 77             | 64 | 45 | 64 | 50 | 68 | 27 | 27                           | 23 | 41 | 41 | 27 | 5  | 45  | 59                   | 0  | 14 | 45 | 45 |  |  |                        |  |  |  |  |  |  |                  |  |  |  |  |  |  |              |  |  |  |  |  |  |                   |  |  |  |  |  |  |                   |  |  |  |  |  |  |                  |  |  |  |  |  |  |                |  |  |  |  |  |  |              |  |  |  |  |  |  |                              |  |  |  |  |  |  |                             |  |  |  |  |  |  |               |  |  |  |  |  |  |                 |  |  |  |  |  |  |                     |  |  |  |  |  |  |                    |  |  |  |  |  |  |            |  |  |  |  |  |  |               |  |  |  |  |  |  |             |  |  |  |  |  |  |
| Devonian Fluvial <sup>(1)</sup> |                     |    |                |    |    |    |    |    |    |                              |    |    |    |    |    |     |                      |    |    |    |    |  |  |                        |  |  |  |  |  |  |                  |  |  |  |  |  |  |              |  |  |  |  |  |  |                   |  |  |  |  |  |  |                   |  |  |  |  |  |  |                  |  |  |  |  |  |  |                |  |  |  |  |  |  |              |  |  |  |  |  |  |                              |  |  |  |  |  |  |                             |  |  |  |  |  |  |               |  |  |  |  |  |  |                 |  |  |  |  |  |  |                     |  |  |  |  |  |  |                    |  |  |  |  |  |  |            |  |  |  |  |  |  |               |  |  |  |  |  |  |             |  |  |  |  |  |  |
|                                 | N/A                 | 3  | 8              | 6  | 0  | 0  | 0  | 52 | 0  | 0                            |    | 0  | 0  | 60 | 63 | N/A | 44                   | 40 | 58 | 38 | 8  |  |  |                        |  |  |  |  |  |  |                  |  |  |  |  |  |  |              |  |  |  |  |  |  |                   |  |  |  |  |  |  |                   |  |  |  |  |  |  |                  |  |  |  |  |  |  |                |  |  |  |  |  |  |              |  |  |  |  |  |  |                              |  |  |  |  |  |  |                             |  |  |  |  |  |  |               |  |  |  |  |  |  |                 |  |  |  |  |  |  |                     |  |  |  |  |  |  |                    |  |  |  |  |  |  |            |  |  |  |  |  |  |               |  |  |  |  |  |  |             |  |  |  |  |  |  |
| Pleistocene Till <sup>(1)</sup> |                     |    |                |    |    |    |    |    |    |                              |    |    |    |    |    |     |                      |    |    |    |    |  |  |                        |  |  |  |  |  |  |                  |  |  |  |  |  |  |              |  |  |  |  |  |  |                   |  |  |  |  |  |  |                   |  |  |  |  |  |  |                  |  |  |  |  |  |  |                |  |  |  |  |  |  |              |  |  |  |  |  |  |                              |  |  |  |  |  |  |                             |  |  |  |  |  |  |               |  |  |  |  |  |  |                 |  |  |  |  |  |  |                     |  |  |  |  |  |  |                    |  |  |  |  |  |  |            |  |  |  |  |  |  |               |  |  |  |  |  |  |             |  |  |  |  |  |  |
|                                 | N/A                 | 2  | 47             | 52 | 47 | 3  | 15 | 47 | 0  | 14                           | 11 | 21 | 18 | 20 | 18 | N/A | 19                   | 2  | 7  | 21 | 57 |  |  |                        |  |  |  |  |  |  |                  |  |  |  |  |  |  |              |  |  |  |  |  |  |                   |  |  |  |  |  |  |                   |  |  |  |  |  |  |                  |  |  |  |  |  |  |                |  |  |  |  |  |  |              |  |  |  |  |  |  |                              |  |  |  |  |  |  |                             |  |  |  |  |  |  |               |  |  |  |  |  |  |                 |  |  |  |  |  |  |                     |  |  |  |  |  |  |                    |  |  |  |  |  |  |            |  |  |  |  |  |  |               |  |  |  |  |  |  |             |  |  |  |  |  |  |

Numeric data represents the presence of microtextures on grains, given in percentage. Orange columns are polygenetic textures, Blue columns are high-stress features, and Yellow columns are percussion textures.

(1) Data is from Mahaney and Kalm (2000)

## Compilation of Gravel-Bed River (GBR) Gradients

Data compilations on GBRs from various regions show maximum slopes of 0.006 (range 0.0005-0.006, average=0.003, n=16) (Blair and McPherson, 1994) to .019 (range 0.0001-0.0190; average=0.0062, n=37) (Church and Rood, 1983). Reported slopes for various reaches of nonbraided GBRs in the modern Rocky Mountains range between 0.00088-0.026 (average=0.0084, n=24), with only two measurements exceeding 0.02 (Andrews,

1984). If the proximal Cutler Formation represents a proglacial system, as proposed by Soreghan et al. (2005), the slopes remain similar. Today, proglacial systems that reach to sea level exist only in mid- to high-latitude regions; these systems can be very steep (.02-.07) within a few km of the ice margin, but follow highly concave profiles such that typical distal gradients are in the  $10^{-3}$  to  $10^{-4}$  range, with average gradients  $<0.01$  over the entire glacial-terminus to coastal-plain distance (Fahnestock, 1963; Boothroyd and Ashley, 1975). As reconstructed from DEM data, for example, the average gradient on the mid-latitude Nisqually River (Washington) from its inception at Nisqually Glacier to its coastal terminus 140 km distant is 0.0089. Figure DR3 shows the paleogeographic reconstructions for the Cutler system.

**Figure DR3:** Paleogeography of Uncompahgre-Paradox region during Cutler-Unaweeep time, with distribution of lowstand (glacial) depositional systems and location of highstand (interglacial) shoreline positions (green dashed line; Condon, 1997). Multiple marine limestones within the lower Cutler Formation as represented from outcrop and well data (Condon, 1997) were used to constrain the maximal highstand position. A-A' shows reconstructions of elevations at the ice terminus using a range of average depositional gradients (see text). Glacioeustatic amplitude shown at A is 100 m (Soreghan and Giles, 1999).

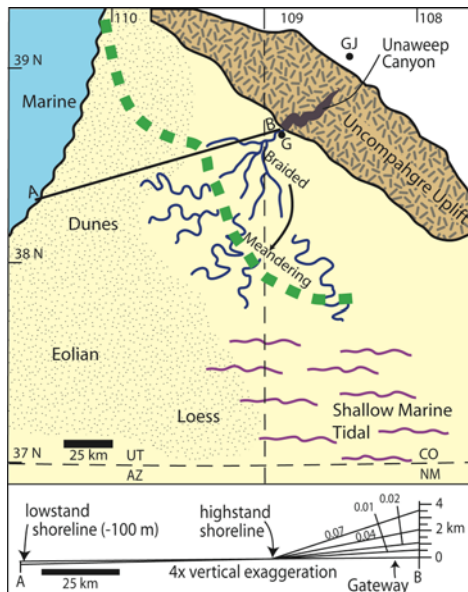

## Loess Geochemistry

Pedogenically modified loessites are those displaying pedogenic features (e.g. ped structure, melanization, root traces, etc) such as outlined in Kessler et al. (1999), Soreghan et al., (2002) and Tramp et al. (2004). Samples coded as loessite are from the middle portions of loessite units and those coded as 'weathered loessite' occur immediately adjacent (within 20 cm) of a paleosol. The good correlation ( $r^2=0.74$ ) of  $\text{TiO}_2$  and  $\text{Al}_2\text{O}_3$  within the paleosols and weathered loessite (Fig. 3B) indicates that these immobile elements become concentrated as weathering proceeds (Nesbitt and Young, 1998). However, the lack of such a correlation within the loessite indicates that the variability is created by source rock variation in  $\text{TiO}_2$  and  $\text{Al}_2\text{O}_3$ . Note that the variation in  $\text{Al}_2\text{O}_3$  in loessite is much smaller compared to paleosols. Given the well-sorted nature of the loessite on average, the variability in  $\text{TiO}_2$  is less than that exhibited in glacial diamictite (Nesbitt and Young, 1998), but the trend is identical nonetheless.

**Table DR 3: Geochemistry of Upper Paleozoic Loessites and Paleosols (in wt%)**

| Sample ID | Lithology <sup>1</sup> | Location <sup>2</sup> | SiO <sub>2</sub> | TiO <sub>2</sub> | Al <sub>2</sub> O <sub>3</sub> | Fe <sub>2</sub> O <sub>3</sub> | MgO  | CaO   | Na <sub>2</sub> O | K <sub>2</sub> O | P <sub>2</sub> O <sub>5</sub> | LOI  |
|-----------|------------------------|-----------------------|------------------|------------------|--------------------------------|--------------------------------|------|-------|-------------------|------------------|-------------------------------|------|
| P107.1    | L                      | BD                    | 83.74            | 0.55             | 7.34                           | 1.53                           | 0.33 | 0.1   | 1.72              | 2.69             | 0.02                          | 1.15 |
| P107.5    | L                      | BD                    | 83.7             | 0.56             | 6.43                           | 1.54                           | 0.27 | 0.01  | 1.65              | 2.53             | 0.06                          | 3.51 |
| P108.0    | L                      | BD                    | 82.6             | 0.54             | 6.87                           | 0.41                           | 0.27 | 0.66  | 1.61              | 2.73             | 0.05                          | 1.24 |
| P56.75    | L                      | BD                    | 83.79            | 0.54             | 7.4                            | 1.58                           | 0.3  | 0.13  | 1.3               | 3.05             | 0.02                          | 0.88 |
| P64.4     | L                      | BD                    | 88.01            | 0.4              | 6.13                           | 0.87                           | 0.18 | 0.12  | 1.33              | 2.42             | 0.01                          | 0.62 |
| LRR 011.0 | L                      | CO                    | 84.58            | 0.38             | 6.81                           | 1.41                           | 0.32 | 0.07  | 1.55              | 2.35             | 0.04                          | 0.92 |
| LRR 011.3 | L                      | CO                    | 84.68            | 0.45             | 6.66                           | 1.47                           | 0.31 | 0.07  | 1.55              | 2.27             | 0.04                          | 0.96 |
| LR20.5    | L                      | CO                    | 84.5             | 0.41             | 5.81                           | 1.25                           | 0.21 | 0.005 | 1.57              | 1.93             | 0.04                          | 2.79 |
| LR20.7    | L                      | CO                    | 82               | 0.53             | 6.86                           | 1.63                           | 0.33 | 0.1   | 1.7               | 2.28             | 0.005                         | 2.32 |
| LRR 26.8  | L                      | CO                    | 84.65            | 0.35             | 6.62                           | 1.49                           | 0.28 | 0.11  | 1.79              | 2.24             | 0.01                          | 1.43 |
| RR 013.2  | L                      | CO                    | 85.43            | 0.35             | 6.17                           | 1.23                           | 0.27 | 0.04  | 1.31              | 2.19             | 0.04                          | 1.09 |
| RR 031.2  | L                      | CO                    | 86.31            | 0.39             | 5.82                           | 1.13                           | 0.23 | 0.03  | 1.27              | 2.11             | 0.04                          | 0.92 |
| RR 041.3  | L                      | CO                    | 85.5             | 0.39             | 6.02                           | 1.25                           | 0.39 | 0.05  | 0.87              | 2.24             | 0.04                          | 1.78 |
| RR 065.65 | L                      | CO                    | 85.86            | 0.32             | 5.97                           | 1.15                           | 0.32 | 0.06  | 1.25              | 2.3              | 0.04                          | 0.97 |
| RR 129.5  | L                      | CO                    | 84.05            | 0.36             | 6.99                           | 1.42                           | 0.27 | 0.06  | 1.64              | 2.61             | 0.04                          | 0.78 |
| RR 153.9  | L                      | CO                    | 87.48            | 0.22             | 5.36                           | 0.87                           | 0.18 | 0.07  | 1.27              | 1.99             | 0.04                          | 0.88 |
| RR 179.1  | L                      | CO                    | 86.47            | 0.35             | 6.18                           | 1.02                           | 0.29 | 0.04  | 1.09              | 2.37             | 0.04                          | 1.07 |
| RR 198.8  | L                      | CO                    | 86.65            | 0.43             | 6.18                           | 1.35                           | 0.25 | 0.06  | 1.29              | 2.12             | 0.04                          | 0.93 |
| URR 011.6 | L                      | CO                    | 83.32            | 0.43             | 6.86                           | 1.59                           | 0.37 | 0.06  | 1.36              | 2.56             | 0.04                          | 1.58 |
| URR 023.0 | L                      | CO                    | 81.05            | 0.61             | 8.27                           | 2.02                           | 0.45 | 0.06  | 1.66              | 2.88             | 0.04                          | 1.24 |
| URR32     | L                      | CO                    | 86.64            | 0.5              | 5.93                           | 1.26                           | 0.28 | 0.08  | 0.98              | 2.26             | 0.005                         | 1.07 |
| URR33.5   | L                      | CO                    | 85.53            | 0.42             | 6.5                            | 1.22                           | 0.25 | 0.07  | 1.1               | 2.53             | 0.005                         | 0.84 |
| URR 034.5 | L                      | CO                    | 85.7             | 0.35             | 6.17                           | 1.15                           | 0.27 | 0.04  | 1.18              | 2.36             | 0.04                          | 1.19 |
| URR48.2   | L                      | CO                    | 84.17            | 0.45             | 7.49                           | 1.72                           | 0.52 | 0.09  | 1.16              | 3.1              | 0.005                         | 1.14 |
| URR 052.1 | L                      | CO                    | 82.97            | 0.51             | 6.97                           | 1.7                            | 0.52 | 0.11  | 1.35              | 2.69             | 0.04                          | 1.77 |
| M 1.6     | L                      | CO                    | 85.75            | 0.39             | 6.06                           | 1.31                           | 0.3  | 0.06  | 1.36              | 2.48             | 0.01                          | 0.86 |
| M1.6      | L                      | CO                    | 84.5             | 0.41             | 6.28                           | 1.4                            | 0.3  | 0.78  | 1.22              | 1.86             | 0.01                          | 1.12 |
| UM2.1     | L                      | CO                    | 87.01            | 0.32             | 5.8                            | 1                              | 0.14 | 0.05  | 1.19              | 2.17             | 0.005                         | 0.62 |
| M2.5      | L                      | CO                    | 84.3             | 0.39             | 6.36                           | 1.43                           | 0.31 | 0.1   | 1.46              | 2.54             | 0.005                         | 2.69 |
| URR 076.7 | L                      | CO                    | 83               | 0.48             | 7.3                            | 1.66                           | 0.34 | 0.05  | 1.46              | 2.66             | 0.04                          | 1.16 |
| URR 096.7 | L                      | CO                    | 83.86            | 0.53             | 7.04                           | 1.58                           | 0.32 | 0.04  | 1.49              | 2.54             | 0.04                          | 1.06 |
| URR 146.8 | L                      | CO                    | 85.5             | 0.24             | 6.63                           | 1.09                           | 0.29 | 0.04  | 1.45              | 2.6              | 0.04                          | 0.75 |
| URR 205.2 | L                      | CO                    | 86.53            | 0.36             | 6.16                           | 1.24                           | 0.21 | 0.04  | 1.62              | 2.1              | 0.04                          | 0.53 |
| URR 225.8 | L                      | CO                    | 85.28            | 0.5              | 6.44                           | 1.43                           | 0.23 | 0.04  | 1.83              | 1.9              | 0.04                          | 0.67 |
| URR 330   | L                      | CO                    | 86.26            | 0.34             | 5.86                           | 1.12                           | 0.28 | 0.05  | 1.08              | 1.96             | 0.04                          | 1.32 |
| URR360.2  | L                      | CO                    | 83.14            | 0.59             | 7.54                           | 1.71                           | 0.37 | 0.12  | 1.92              | 1.95             | 0.005                         | 0.92 |
| URR369    | L                      | CO                    | 82.63            | 0.62             | 8.03                           | 1.9                            | 0.41 | 0.1   | 1.91              | 2.09             | 0.005                         | 1.04 |
| P70.95    | L                      | BD                    | 86.42            | 0.62             | 6.5                            | 1.2                            | 0.29 | 0.13  | 1.27              | 2.32             | 0.01                          | 0.86 |
| P97.6     | L                      | BD                    | 84.05            | 0.45             | 7.47                           | 1.71                           | 0.53 | 0.09  | 1.14              | 3.06             | 0.005                         | 0.95 |
| P79.55    | L(L)                   | BD                    | 81.84            | 0.7              | 8.92                           | 1.75                           | 0.35 | 0.27  | 1.79              | 3.83             | 0.02                          | 0.51 |
| LR20.3    | L(L)                   | CO                    | 84.7             | 0.28             | 5.22                           | 1.08                           | 0.21 | 0.65  | 1.3               | 1.66             | 0.12                          | 3.16 |
| P54.0     | L(L)                   | BD                    | 81.5             | 0.75             | 7.95                           | 1.92                           | 0.42 | 0.17  | 1.43              | 3.02             | 0.02                          | 1.19 |
| URR 169.7 | L(L)                   | CO                    | 86.05            | 0.41             | 5.9                            | 1.25                           | 0.22 | 0.06  | 1.4               | 2.29             | 0.04                          | 0.58 |
| URR 183.4 | L(L)                   | CO                    | 85.61            | 0.37             | 6.14                           | 1.37                           | 0.33 | 0.05  | 1.34              | 2.38             | 0.04                          | 0.75 |
| URR347.7  | L(L)                   | CO                    | 90.25            | 0.23             | 4.56                           | 0.73                           | 0.15 | 0.05  | 0.9               | 1.68             | 0.005                         | 0.66 |
| URR357.5  | L(L)                   | CO                    | 80.43            | 0.71             | 8.81                           | 2.42                           | 0.55 | 0.11  | 1.78              | 2.58             | 0.02                          | 1.65 |
| URR364    | L(L)                   | CO                    | 83.62            | 0.6              | 7.29                           | 1.77                           | 0.36 | 0.07  | 1.65              | 2.23             | 0.005                         | 0.96 |
| UR 364    | L(L)                   | CO                    | 83.98            | 0.6              | 6.95                           | 1.78                           | 0.35 | 0.06  | 1.87              | 2.1              | 0.02                          | 1.28 |
| P19.35    | P                      | BD                    | 73.21            | 0.87             | 11.72                          | 3.44                           | 1.03 | 0.14  | 1.37              | 4.28             | 0.02                          | 2.48 |
| M3.3      | P                      | CO                    | 82.5             | 0.45             | 7.18                           | 1.55                           | 0.35 | 0.03  | 1.5               | 2.78             | 0.02                          | 2.14 |
| UR363.4   | P                      | CO                    | 80.8             | 0.62             | 8.01                           | 1.95                           | 0.39 | 0.28  | 2                 | 2.4              | 0.01                          | 2.1  |
| UR363.8   | P                      | CO                    | 75.8             | 0.79             | 10.3                           | 3.26                           | 1    | 0.25  | 1.76              | 3.68             | 0.05                          | 3.57 |
| P107.8    | P(W)                   | BD                    | 77.6             | 0.71             | 9.28                           | 2.99                           | 0.79 | 0.8   | 1.42              | 3.41             | 0.04                          | 3.57 |
| P107.8    | P(W)                   | BD                    | 77.6             | 0.71             | 9.28                           | 2.99                           | 0.79 | 0.8   | 1.42              | 3.41             | 0.04                          | 3.57 |
| P41.25    | P(W)                   | BD                    | 76.12            | 0.83             | 11.11                          | 3.25                           | 0.91 | 0.17  | 1.34              | 3.23             | 0.03                          | 2.44 |
| P52.1     | P(W)                   | BD                    | 81.93            | 0.7              | 8.16                           | 1.99                           | 0.45 | 0.11  | 1.39              | 2.85             | 0.02                          | 0.9  |
| LR20.9    | P(W)                   | CO                    | 82.1             | 0.51             | 7.15                           | 1.75                           | 0.38 | 0.005 | 1.76              | 2.31             | 0.02                          | 2.61 |
| LRR30.25  | P(W)                   | CO                    | 80.52            | 0.38             | 8.48                           | 2.05                           | 1.36 | 0.26  | 0.9               | 3.5              | 0.08                          | 2.23 |
| LRR31.3   | P(W)                   | CO                    | 88.3             | 0.32             | 5.75                           | 1.05                           | 0.18 | 0.08  | 1.31              | 1.98             | -0.01                         | 0.91 |
| LRR32.1   | P(W)                   | CO                    | 80.75            | 0.49             | 8.99                           | 2.11                           | 0.64 | 0.22  | 1.38              | 2.86             | 0.01                          | 1.58 |
| RR 106.7  | P(W)                   | CO                    | 86.41            | 0.29             | 6.33                           | 1.27                           | 0.26 | 0.06  | 1.57              | 2.25             | 0.04                          | 0.83 |
| M2.9      | P(W)                   | CO                    | 80.1             | 0.5              | 8.71                           | 2.18                           | 0.91 | 0.35  | 1.29              | 3.62             | 0.02                          | 2.38 |
| URR351.6  | P(W)                   | CO                    | 79.21            | 0.65             | 8.97                           | 2.55                           | 0.78 | 0.14  | 1.25              | 3.36             | 0.02                          | 2.28 |

Note: (1) Lithology: L=Loessite; L(L)=Sample immediately above paleosol; P=Paleosol; and P(W)=Weakly Pedogenic.

(2) Locality represents sample site: BD=Bravo Dome region, NM (see Kessler et al., 2001 for stratigraphic details) and CO= near Basalt, CO (see Tramp, et al., 2004 for stratigraphic details). Data summarized from Soreghan and Soreghan, 2007.

## Climate Modelling

Late Paleozoic experiments were completed using GENESIS AGCM version 2.3 coupled to a 3-D dynamic ice-sheet model. GENESIS consists of an AGCM coupled to multi-layer models of vegetation, soil or land ice, and snow, with spectral resolution of T31 ( $\sim 3.75^\circ$ ) and 18 vertical layers (Thompson and Pollard, 1997). GENESIS is asynchronously coupled to a 3-D thermo-mechanical ice-sheet model (DeConto and Pollard, 2003) that is based on the vertically integrated continuity equation for ice mass. The ice geometry is determined by the surface mass balance, basal melting, and ice flow. Sea-surface temperatures and sea ice are computed using a 50-m slab ocean with diffusive heat. A series of Late Paleozoic experiments were completed with a range of atmospheric  $\text{CO}_2$  and orbital settings (Horton et al., 2007). Here we report on a simulation that produces the maximum continental ice extent. The simulation uses a palaeogeography and palaeotopography from the Paleogeographic Atlas Project's reconstruction for the Sakmarian (see <http://pgap.uchicago.edu>), atmospheric  $\text{CO}_2$  level of 140 ppmv, pre-industrial levels of  $\text{CH}_4$  and  $\text{N}_2\text{O}$ , a 3% reduction in solar luminosity, and orbital settings that minimize Southern Hemisphere summer insolation (obliquity =  $22^\circ$ , eccentricity = 0.06, precession =  $270^\circ$ ). Montañez et al. (2007) report atmospheric  $\text{pCO}_2$  as low as 280 ppmv in the Late Paleozoic. We have used a value that represents one-half of this concentration, and is similar to Last Glacial Maximum values, in order to maximize glaciation. Specifying higher levels of atmospheric  $\text{pCO}_2$  raise the minimum elevation that will sustain glaciation. In western equatorial Pangaea, palaeotopography is 500-1500 m owing to the Central Pangaeian Mountains.

## References

- Andrews, E.D., 1984, Bed-material entrainment and hydraulic geometry of gravel-bed rivers in Colorado: Geological Society of America Bulletin, v. 95, p. 371-378.
- Blair, T.C., and McPherson, J.G., 1994, Alluvial fans and their natural distinction from rivers based on morphology, hydraulic processes, sedimentary processes, and facies assemblages: Journal of Sedimentary Research, v. A64, p. 450-489.
- Boothroyd, J.C., and Ashley, G.M., 1975, Processes, bar morphology, and sedimentary structures on braided outwash fans, northeastern Gulf of Alaska, in Jopling A.V. and McDonald, B.C., eds., Glaciofluvial and Glaciolacustrine Sedimentation: SEPM Special Publication no. 23, p. 193-222.
- Church, M., and Rood, K., 1983, "Catalogue of Alluvial River Channel Regime Data" (Univ. British Columbia, Department of Geography, Vancouver).
- Condon, S.M., 1997, Geology of the Pennsylvanian and Permian Cutler Group and Permian Kaibab Limestone in the Paradox Basin, Southeastern Utah and Southwestern Colorado U. S. Geological Survey Bulletin 2000-P, 46 p.
- DeConto, R., and Pollard, D., 2003, A coupled climate-ice sheet modelling approach to the Early Cenozoic history of the Antarctic ice sheet Palaeogeography, Palaeoclimatology, Palaeoecology, v. 198, p. 39-52.
- Fahnestock, R.K., 1963, Morphology and hydrology of a glacial stream, White River, Mount Rainier, Washington: U.S. Geological Survey Professional Paper 422-A, 70 p.

- Horton, D.E., Poulsen, C.J., and Pollard, D., 2007, Orbital and CO<sub>2</sub> forcing of late Paleozoic continental ice sheets, *Geophysical Research Letters*, v. 34, L19708, doi:10.1029/2007GL03188.
- Janitzky, P., 1986, Laboratory methods: Citrate-bicarbonate-dithionite (CBD) extractable iron and aluminium, in M.J. Singer & P. Janitzky, eds., *Field and Laboratory Procedures used in a Soil Chronosequence Study*. U.S. Geological Survey Bulletin, B 1648, p. 38-41.
- Mahaney, W.C., 2000 *Atlas of Sand Grain Surface Textures and Applications*: Oxford University Press, Oxford, U.K.
- Mahaney, W.C., and Kalm, V., 2000, Comparative scanning electron microscopy study of oriented till blocks, glacial grains and Devonian sands in Estonia and Latvia: *Boreas*, v. 29, p. 35-51.
- Mehra, O.P. & Jackson, M.L. Iron oxides removal from soils and clays. Dithionite-citrate systems buffered with sodium bicarbonate, in Swineford, A., Ed., *Proceedings 7th National Conference on Clays and Clay Minerals*, Pergamon Press, Washington, DC, p. 317-327.
- Montañez, I.P., Tabor, N.J., Niemeier, D., DiMichele, W.A., Frank, T.D., Fielding, C.R., Isbell, J.L., Blrgenheier, L.P., and Rygel, M.C., 2007, CO<sub>2</sub>-forced climate and vegetation instability during late Paleozoic deglaciation: *Science*, v. 315, p. 87-91, doi: 10.1126/science.1134207.
- Soreghan, G.S., and Giles, K.A., 1999, Amplitudes of Late Pennsylvanian glacioeustasy: *Geology*, v. 27, p. 255-258.



- Soreghan, G.S., Soreghan, M.J., Eble, C.F., Sweet, D., Davogustto, O., Young, R.A., and Elmore, R.D., 2005, Late Paleozoic deglaciation in western equatorial Pangaea: Eos Transactions, American Geophysical Union, v. 86 (52), Fall Meeting Supplement, Abstract T11D-0406.
- Soreghan, G.S., Sweet, D.E., Marra, K.R., Eble, C.F., Soreghan, M.J., Elmore, R.D., Kaplan, S.A., and Blum, M.D., 2007, An exhumed Late Paleozoic canyon in the Rocky Mountains: *Journal of Geology*, v. 115, p. 473-481.
- Suarez-Rojas, Y., 2007, Acquisition, Processing and Modeling of Shallow Seismic Refraction and Reflection Profiles: Unaweep Canyon, Colorado: M.S. Thesis, University of Oklahoma, Norman, Oklahoma, 135 p.
- Thompson, S., and Pollard, D., 1997, Greenland and Antarctic mass balances for present and doubled atmospheric CO<sub>2</sub> from GENESIS version-2 global climate model *Journal of Climate*, v. 10, p. 871-900.
- Van Hoesen, J.G., and Orndorff, R.L., 2004, A comparative SEM study on the micromorphology of glacial and nonglacial clasts with varying age and lithology: *Canadian Journal of Earth Sciences*, v. 41, p. 1123-1139.
